# Supplementary material for: Synthesis of HZSM-5@silicalite-1 core–shell composite and its catalytic application in the generation of p-xylene by methylation of toluene with methyl bromide
Source: Royal Society of Chemistry journal article supplement (doi:10.1039/c4ra04126g), 2014-01-01
Supplement: c4ra04126g1.pdf [file c4ra04126g1.pdf]

## **Supplementary Information**

### **Synthesis of HZSM-5@silicalite-1 core-shell composite and its catalytic application in generation of *p*-xylene by methylation of toluene with methyl bromide**

**Yi-Qiang Deng,<sup>a</sup> Wei-Fang Zhou,<sup>a</sup> Hao-Ming Lv,<sup>a</sup> Ying-Ying Zhang,<sup>a</sup> Chak-Tong  
Au,<sup>a,b</sup> and Shuang-Feng Yin<sup>a,\*</sup>**

<sup>a</sup> State Key Laboratory of Chemo/Biosensing and Chemometrics, College of Chemistry and  
Chemical Engineering, Hunan University, Changsha 410082, Hunan, China

<sup>b</sup> Department of Chemistry, Hong Kong Baptist University, Kowloon Tong, Hong Kong

\*Corresponding author:

Tel (Fax): 86-731-88821310

E-mail: [sf\\_yin@hnu.edu.cn](mailto:sf_yin@hnu.edu.cn) (S.F. Yin)

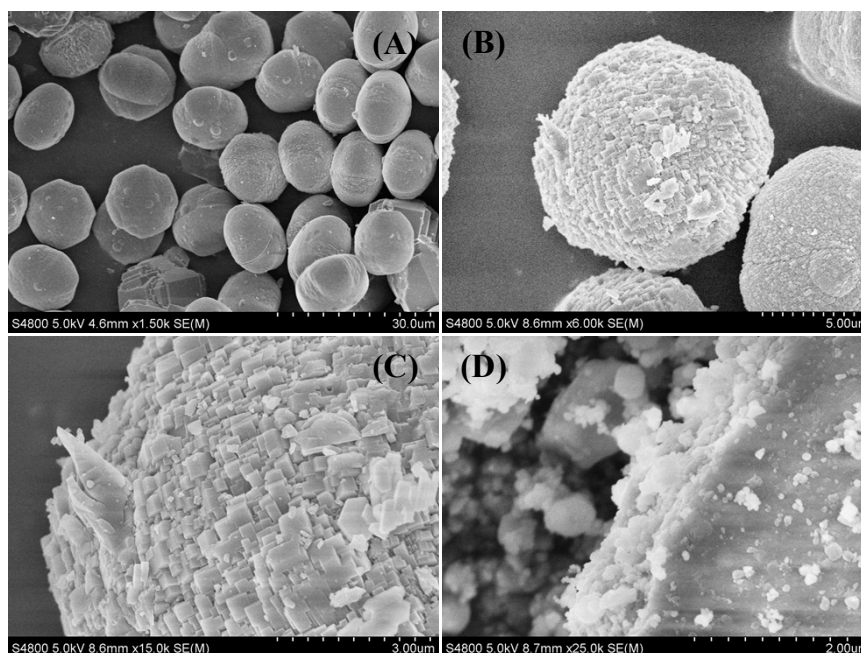

**Figure S1.** (A) SEM images of the large parent HZSM-5, and (B, C, D) the core-shell structured HZSM-5@silicalite-1. (D: To obtain a section between the zeolite core and silicalite-1 shell, the powder sample was ground extensively before the SEM investigation.)

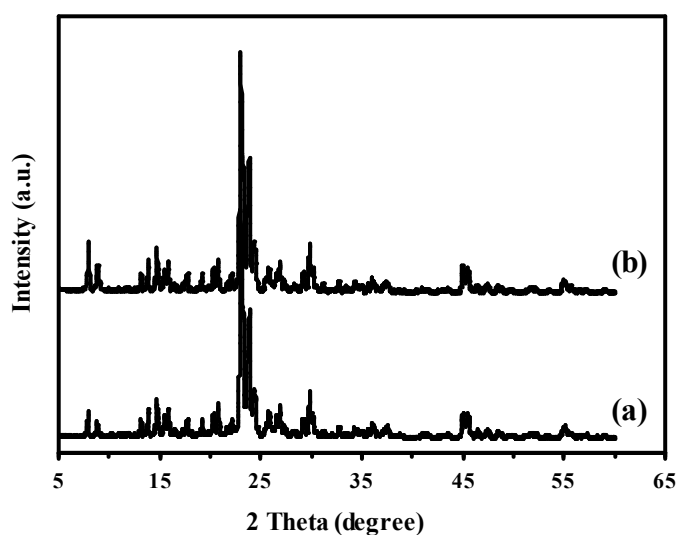

**Figure S2.** XRD profiles of (a) the large parent HZSM-5, and (b) the core-shell structured HZSM-5@silicalite-1.
